# Supplementary material for: Enhancing Lagrangian Dual Optimization for Linear Programs by Obviating Nondifferentiability
Source: Atypon-hosted journal article supplement (doi:10.1287/ijoc.1050.0158), 2007-02-01
Supplement: ijoc.1050.0158-sm-sherali_and_lim.pdf [file ijoc.1050.0158-sm-sherali_and_lim.pdf]

# Online Supplement to “Enhancing Lagrangian Dual Optimization for Linear Programs by Obviating Nondifferentiability”

Hanif D. Sherali, Churlzu Lim

Grado Department of Industrial and Systems Engineering, Virginia Polytechnic Institute and State University,  
Blacksburg, Virginia 24061, USA, {hanifs@vt.edu, clim@vt.edu}

*INFORMS Journal on Computing*

## Appendix: Proof of Proposition 1.

Using (15a,b) of the paper, the derivative of  $\bar{x}_j$ , viewed as a function  $\bar{x}_j(\bar{c}_j)$  of  $\bar{c}_j$ , at the point  $\bar{c}_j = 0$ , yields, via L'Hospital's rule,

$$\begin{aligned}
 \left. \frac{d\bar{x}_j(\bar{c}_j)}{d\bar{c}_j} \right|_{\bar{c}_j=0} &= \lim_{\Delta\bar{c}_j \rightarrow 0} \frac{\bar{x}_j(\Delta\bar{c}_j) - \bar{x}_j(0)}{\Delta\bar{c}_j} \\
 &= \lim_{\Delta\bar{c}_j \rightarrow 0} \frac{\frac{\Delta\bar{c}_j(l_j + u_j) + 2\mu - \sqrt{\Delta\bar{c}_j^2(u_j - l_j)^2 + 4\mu^2}}{2\Delta\bar{c}_j} - \frac{l_j + u_j}{2}}{\Delta\bar{c}_j} \\
 &= \lim_{\Delta\bar{c}_j \rightarrow 0} \frac{2\mu - \sqrt{\Delta\bar{c}_j^2(u_j - l_j)^2 + 4\mu^2}}{2\Delta\bar{c}_j^2} \\
 &= \lim_{\Delta\bar{c}_j \rightarrow 0} \frac{-\Delta\bar{c}_j(u_j - l_j)^2}{4\Delta\bar{c}_j \sqrt{\Delta\bar{c}_j^2(u_j - l_j)^2 + 4\mu^2}} \\
 &= \lim_{\Delta\bar{c}_j \rightarrow 0} \frac{-(u_j - l_j)^2}{4\sqrt{\Delta\bar{c}_j^2(u_j - l_j)^2 + 4\mu^2}} = \frac{-(u_j - l_j)^2}{8\mu}. \tag{S1}
 \end{aligned}$$

On the other hand, we have

$$\begin{aligned}
\left. \frac{d\bar{x}_j(\bar{c}_j)}{d\bar{c}_j} \right|_{\bar{c}_j \neq 0} &= \frac{\left[ (l_j + u_j) - \frac{1}{2} (2\bar{c}_j(u_j - l_j)^2) (\bar{c}_j^2(u_j - l_j)^2 + 4\mu^2)^{-1/2} \right] (2\bar{c}_j)}{(2\bar{c}_j)^2} \\
&\quad - \frac{2 \left[ \bar{c}_j(l_j + u_j) + 2\mu - (\bar{c}_j^2(u_j - l_j)^2 + 4\mu^2)^{1/2} \right]}{(2\bar{c}_j)^2} \\
&= \frac{2(\bar{c}_j^2(u_j - l_j)^2 + 4\mu^2)^{1/2} - 2\bar{c}_j^2(u_j - l_j)^2(\bar{c}_j^2(u_j - l_j)^2 + 4\mu^2)^{-1/2} - 4\mu}{4\bar{c}_j^2}.
\end{aligned}$$

Hence, using L'Hospital's rule we have

$$\begin{aligned}
\lim_{\bar{c}_j \rightarrow 0} \frac{d\bar{x}_j(\bar{c}_j)}{d\bar{c}_j} &= \lim_{\bar{c}_j \rightarrow 0} \left[ \frac{2\bar{c}_j(u_j - l_j)^2 (\bar{c}_j^2(u_j - l_j)^2 + 4\mu^2)^{-1/2}}{8\bar{c}_j} \right. \\
&\quad - \frac{4\bar{c}_j(u_j - l_j)^2 (\bar{c}_j^2(u_j - l_j)^2 + 4\mu^2)^{-1/2}}{8\bar{c}_j} \\
&\quad \left. + \frac{\bar{c}_j^2(u_j - l_j)^2 (2\bar{c}_j(u_j - l_j)^2) (\bar{c}_j^2(u_j - l_j)^2 + 4\mu^2)^{-3/2}}{8\bar{c}_j} \right] \\
&= \lim_{\bar{c}_j \rightarrow 0} \left[ \frac{-2(u_j - l_j)^2 (\bar{c}_j^2(u_j - l_j)^2 + 4\mu^2)^{-1/2}}{8} \right. \\
&\quad \left. + \frac{2\bar{c}_j^2(u_j - l_j)^4 (\bar{c}_j^2(u_j - l_j)^2 + 4\mu^2)^{-3/2}}{8} \right] \\
&= -\frac{(u_j - l_j)^2}{8\mu}. \tag{S2}
\end{aligned}$$

From (S1) and (S2), we see that  $\left. \frac{d\bar{x}_j(\bar{c}_j)}{d\bar{c}_j} \right|_{\bar{c}_j=0} = \lim_{\bar{c}_j \rightarrow 0} \frac{d\bar{x}_j}{d\bar{c}_j} = \frac{-(u_j - l_j)^2}{8\mu}$ .  $\square$
